# Supplementary material for: Prevalence of ABCA4 Deep-Intronic Variants and Related Phenotype in An Unsolved “One-Hit” Cohort with Stargardt Disease
Source: PubMed Central journal article supplement (PMC6829239; doi:10.3390/ijms20205053), 2019-10-11
Supplement: ijms-20-05053-s001.pdf [file ijms-20-05053-s001.pdf]

**Table S1.** List of all variants screened in this study.

| Genome starting position (hg19) | Location on ABCA4 | Variant (NM_000350.2) | Effect on protein ( <i>in vitro</i> assays, when available) (NP_000341.2) | Reference           |
|---------------------------------|-------------------|-----------------------|---------------------------------------------------------------------------|---------------------|
| g.94577158                      | IVS2              | c.161-23T>G           | p.[=,Cys54Serfs*14]                                                       | Bauwens 2019 [1]    |
| g.94566773                      | IVS5              | c.570+1798A>G         | -                                                                         | Zernant 2014 [2]    |
| g.94563992                      | IVS6              | c.768+358C>T          | -                                                                         | Zernant 2014 [2]    |
| g.94549781                      | IVS6              | c.769-784C>T          | p.[=,Leu257Asp*3]                                                         | Sangermano 2019 [3] |
| g.94546814                      | IVS7              | c.859-540C>G          | p.(Phe287Tyrfs*33)                                                        | Bauwens 2019 [1]    |
| g.94546780                      | IVS7              | c.859-506G>C          | p.[Phe287Thrfs*32,=]                                                      | Sangermano 2019 [3] |
| g.94526934                      | IVS13             | c.1938-619A>G         | -                                                                         | Zernant 2014 [2]    |
| g.94525509                      | IVS14             | c.2160+584A>G         | -                                                                         | Zernant 2014 [2]    |
| g.94509799                      | IVS20             | c.3050+370C>T         | -                                                                         | Zernant 2014 [2]    |
| g.94496509                      | IVS28             | c.4253+43G>A          | p.[=, Ile1377Hisfs*3]                                                     | Sangermano 2019 [3] |
| g.94493901                      | IVS30             | c.4539+1100A>G        | p.[ Arg1514Valfs*31,Arg1514Glyfs*3,=]                                     | Sangermano 2019 [3] |
| g.94493895                      | IVS30             | c.4539+1106C>T        | p.[Arg1514Glyfs*3, Arg1514Valfs*31]                                       | Bauwens 2019 [1]    |
| g.94493272                      | IVS30             | c.4539+1729G>T        | -                                                                         | Zernant 2014 [2]    |
| g.94493000                      | IVS30             | c.4539+2001G>A        | p.[=,Arg1514Leufs*36]                                                     | Albert 2018 [4]     |
| g.94492973                      | IVS30             | c.4539+2028C>T        | p.[=,Arg1514Leufs*36]                                                     | Albert 2018 [4]     |
| g.94492937                      | IVS30             | c.4539+2064C>T        | p.[=,Arg1514Leufs*36]                                                     | Bauwens 2019 [1]    |
| g.94484039                      | IVS36             | c.5196+1013A>G        | -                                                                         | Schulz 2017 [5]     |
| g.94484082                      | IVS36             | c.5196+1056A>G        | -                                                                         | Braun 2013 [6]      |
| g.94484000                      | IVS36             | c.5196+1136C>A        | -                                                                         | Bauwens 2015 [7]    |
| g.94484001                      | IVS36             | c.5196+1137G>A        | p.[=,Met1733Glufs*78]                                                     | Braun 2013 [6]      |
| g.94483865                      | IVS36             | c.5196+1159G>A        | -                                                                         | Bauwens 2015 [7]    |
| g.94483922                      | IVS36             | c.5196+1216C>A        | -                                                                         | Braun 2013 [6]      |
| g.94481967                      | IVS36             | c.5197-557G>T         | p.(Met1733*)                                                              | Bauwens 2019 [1]    |
| g.94468019                      | IVS44             | c.6148-471C>T         | -                                                                         | Zernant 2014 [2]    |

**Table S2.** Evolutionary conservation of the two novel deep intronic variants with predicted *in silico* effect on splicing. Nucleotidic genomic and complementary DNA (cDNA) positions correspond to GRCh37 (hg19) and CCDS747.1, respectively.

| Nucleotide position (cDNA)    | c.768+508            | c.859-245_859-243      |
|-------------------------------|----------------------|------------------------|
| Nucleotide position (genomic) | g.94563842T          | g.94546517_94546519ATG |
| Altered residue               | C                    | TCA                    |
| Human                         | AACCA <b>TT</b> GAGG | GGCTC <b>ATG</b> CCTGT |
| Chimp                         | AACCA <b>TT</b> GAGG | GGCTC <b>ATG</b> CCTGT |
| Gorilla                       | AACCA <b>TT</b> GAGG | GGCTC <b>ATG</b> CCTGT |
| Orangutan                     | AACTA <b>TT</b> GAGG | GGCTC <b>ACG</b> CCTGT |
| Rhesus                        | AACTA <b>TT</b> GAGG | GGTTC <b>ATG</b> CCTGT |
| Baboon                        | AACTA <b>TT</b> GAGG | GGTTC <b>ATG</b> CCTGT |
| Marmoset                      | AACT <b>TT</b> GAGG  | -----                  |
| Tarsier                       | AAGT <b>TT</b> GGGG  | -----                  |
| Mouse_lemur                   | AACAT <b>TT</b> GACA | -----                  |
| Bushbaby                      | AGCCT <b>TT</b> GAGG | -----                  |
| Tree_shrew                    | AAGCT <b>CT</b> GAGG | -----                  |
| Mouse                         | ACCT <b>TT</b> GGGGA | -----                  |
| Rat                           | ACC-- <b>T</b> GGGGA | -----                  |
| Kangaroo_rat                  | AACT <b>TT</b> GGGG  | -----                  |
| Guinea_pig                    | AACT <b>TT</b> GAGG  | -----                  |
| Squirrel                      | CATT <b>GT</b> TGGG  | -----                  |

|            |             |             |
|------------|-------------|-------------|
| Rabbit     | AACATTTGGGG | -----       |
| Pika       | AACATTTGGGG | -----       |
| Alpaca     | -----       | -----       |
| Dolphin    | AAACTTTGGGG | -----ACCTGC |
| Cow        | AAGCTCTGAGG | -----       |
| Horse      | AACCTTTGGGG | -----       |
| Cat        | AACCTTTGTGG | -----       |
| Dog        | AACCTTTGTGG | -----       |
| Microbat   | AACGTTTGGGG | -----       |
| Megabat    | AAACTTTGCGG | -----       |
| Hedgehog   | -----       | -----       |
| Shrew      | AAGCTTTAGAG | -----       |
| Elephant   | AAC-TTGTTC  | -----       |
| Rock_hyrax | AAC-TTACTAG | -----       |
| Tenrec     | -----       | -----       |
| Armadillo  | ATC-CTCGGGA | -----       |
| Sloth      | AACATTTGGAA | -----       |

**Table S3.** List of primers designed to investigate the deep intronic variants included in this study.

| Primer ID           | Forward primer (FASTA format) | Primer ID           | Reverse primer (FASTA format) | Amplicon size (base pair) |
|---------------------|-------------------------------|---------------------|-------------------------------|---------------------------|
| ABCA4_int5F         | CCGAAACTAGACAAGGGGAA<br>C     | ABCA4_int5R         | AAAGCATCCTGGGAAGTGGG          | 508                       |
| ABCA4_int6F         | TGGCATGTTTGTGTCCACTCT         | ABCA4_int6R         | CAGGTCCCAAGCAGTCTGTC          | 413                       |
| ABCA4_int6bisF      | GATACTTGGATGAGAATTAC          | ABCA4_int6bisR      | AGCTCCAGAGACTGATGTGA          | 258                       |
| ABCA4_int7F         | CCCAAGAACTGGCTTAACAG          | ABCA4_int7R         | GCTCCAACGTTTGGTTTAC           | 591                       |
| ABCA4_int13F        | ATGCTGGAATTGGGCCCTTT          | ABCA4_int13R        | AGGACTGACAAGGGCAAGTG          | 388                       |
| ABCA4_int14F        | CAGTAGCAGTAGGGGAGGAG<br>A     | ABCA4_int14R        | AAAATGAAGGATAGCAGCGC<br>A     | 278                       |
| ABCA4_int20F        | GAGCAGCTGATCGATCCCC           | ABCA4_int20R        | TCCCTTTTCTCCCTCCTGT           | 354                       |
| ABCA4_int30F        | CCTCAGCCTCATCAGCCAAT          | ABCA4_int30R        | GCGTGGAAAGTAAGGGTTCGT         | 603                       |
| ABCA4_int30bis<br>F | ATACATGCACAGCCAGCATC          | ABCA4_int30bis<br>R | CATACCTGTGCTTTCCCACT          | 274                       |
| ABCA4_int36F        | TGGAGACCAACACAAATGAC<br>C     | ABCA4_int36R        | GCCAGCCCCAAGTGTGTAATA         | 392                       |
| ABCA4_int36bis<br>F | CAACTCATTTATCTACCGGAC         | ABCA4_int36bis<br>R | TTCTTGGCTTCACAAAAGTCA         | 381                       |
| ABCA4_int44F        | TAGATCCCCTCCTGCGCAT           | ABCA4_int44R        | TCCCAGACCTGTTGATCCCA          | 261                       |

**Table S4.** Clinical criteria used to describe patients' phenotype in this study. FP= Fundus photograph; SW-AF= Short-Wavelength Fundus Autofluorescence; NIR-AF= Near Infrared Fundus Autofluorescence; ERG= Electroretinogram; OCT= Optical coherence tomography; RPE: Retinal pigment epithelium; EZ: Ellipsoid zone.

|                                                        | <b>Group/Stage</b>                                                                                  | <b>Criteria</b>                                                                                                                                                                                                      | <b>Reference</b>             |
|--------------------------------------------------------|-----------------------------------------------------------------------------------------------------|----------------------------------------------------------------------------------------------------------------------------------------------------------------------------------------------------------------------|------------------------------|
| <b>Age of onset</b>                                    | n.a.                                                                                                | Age when symptoms first occurred.                                                                                                                                                                                    | Lois N et al. 2001 [8]       |
| <b>FP</b><br>(Supplementary Fig 1)                     | Stage 1                                                                                             | Central macular atrophy with foveal or perifoveal flecks.                                                                                                                                                            | Fishman GA et al. 1976 [9]   |
|                                                        | Stage 2                                                                                             | Previous stage + numerous flecks, extending beyond the vascular arcades or the optic disc.                                                                                                                           |                              |
|                                                        | Stage 3                                                                                             | Macular chorioretinal atrophy and resorption of flecks.                                                                                                                                                              |                              |
|                                                        | Stage 4                                                                                             | Extensive chorioretinal atrophy.                                                                                                                                                                                     |                              |
| <b>SW-AF and NIR-AF</b><br>(Supplementary Fig 2 and 3) | Group 1                                                                                             | Central lesion with irregular border.                                                                                                                                                                                | Duncker T, et al 2014 [10]   |
|                                                        | Group 2                                                                                             | Extensive fundus changes.                                                                                                                                                                                            |                              |
|                                                        | Group 3                                                                                             | Central lesion with smooth border and hyperautofluorescent ring in both SW-AF e NIR-AF.                                                                                                                              |                              |
|                                                        | Group 4                                                                                             | Central lesion with smooth border and hyperautofluorescent ring only in SW-AF.                                                                                                                                       |                              |
|                                                        | Group 5                                                                                             | Small central lesion, better detectable in NIR-AF.                                                                                                                                                                   |                              |
|                                                        | Peripapillary sparing<br>Flecks in the peripapillary area<br>Peripapillary area involved by atrophy | Absence of any alterations within 0.6 mm of eccentricity from the optic disc.<br>Presence of flecks within 0.6 mm of eccentricity from the optic disc.<br>Atrophy within 0.6 mm of eccentricity from the optic disc. | Cideciyan AV et al 2005 [11] |
| <b>ERG</b>                                             | I                                                                                                   | All components of ERG are within normal ranges                                                                                                                                                                       | Lois N et al. 2001 [8]       |
|                                                        | II                                                                                                  | Abnormal amplitudes and implicit times in response to all the light adapted stimulations                                                                                                                             |                              |
|                                                        | III                                                                                                 | Abnormal amplitudes and implicit times in response to all stimulations                                                                                                                                               |                              |
| <b>SW-FAF and OCT</b><br>(Supplementary Fig 4)         | Spared Fovea                                                                                        | Foveal sparing with late onset, intact RPE and EZ on OCT                                                                                                                                                             | Fujinami K et al. 2013 [12]  |
|                                                        | Involved Fovea                                                                                      | Foveal EZ and/or RPE atrophy and early age of onset                                                                                                                                                                  |                              |

**Table S5.** Electrophysiological data in a group of 30 healthy volunteers. ERG: electroretinogram; SD: Standard deviation; IT: implicit time; Amp: amplitude.

| Age Group      | Dark Adapted 0.01 ERG |                     |               | Dark-Adapted 10.0 ERG |               |                     | Light Adapted 3.0 Flicker |               | Light Adapted 3.0 ERG |                     |               |                     |
|----------------|-----------------------|---------------------|---------------|-----------------------|---------------|---------------------|---------------------------|---------------|-----------------------|---------------------|---------------|---------------------|
|                | b-wave IT, ms         | b-wave Amp, $\mu$ V | a-wave IT, ms | a-wave Amp, $\mu$ V   | b-wave IT, ms | b-wave Amp, $\mu$ V | Period, ms                | Amp, $\mu$ V  | a-wave IT, ms         | a-wave Amp, $\mu$ V | b-wave IT, ms | b-wave Amp, $\mu$ V |
| 13-30 y (n=15) | 80-105                | 176-447             | 8.5-13        | 254-498               | 28-53         | 270-635             | 24-28                     | 78-220        | 12-15                 | 32-70               | 27-32         | 106-305             |
| Mean (SD)      | 93.7 (4.9)            | 301.2 (75.2)        | 11 (1.5)      | 391 (63.5)            | 45 (3.9)      | 487 (98.25)         | 25.1 (0.7)                | 140 (27.25)   | 13.4 (0.6)            | 57.1 (10.5)         | 28.5 (1.1)    | 201 (42.58)         |
|                | 19.46 $\pm$ 6.41      |                     |               |                       |               |                     |                           |               |                       |                     |               |                     |
| 31-65 y (n=15) | 81-107                | 101-389             | 09-13         | 198-501               | 30-55         | 300-657             | 24-29                     | 67-214        | 12-15                 | 21-65               | 26-32         | 92-235              |
| Mean (SD)      | 94.23 (6.2)           | 251 (72.2)          | 12 (1.5)      | 322.1 (100.5)         | 49.54 (5.1)   | 442 (88.25)         | 25 (1.1)                  | 99.25 (21.46) | 13.5 (1)              | 40.74 (12.75)       | 28.21 (0.7)   | 157 (40.5)          |
|                | 47.26 $\pm$ 9.76      |                     |               |                       |               |                     |                           |               |                       |                     |               |                     |

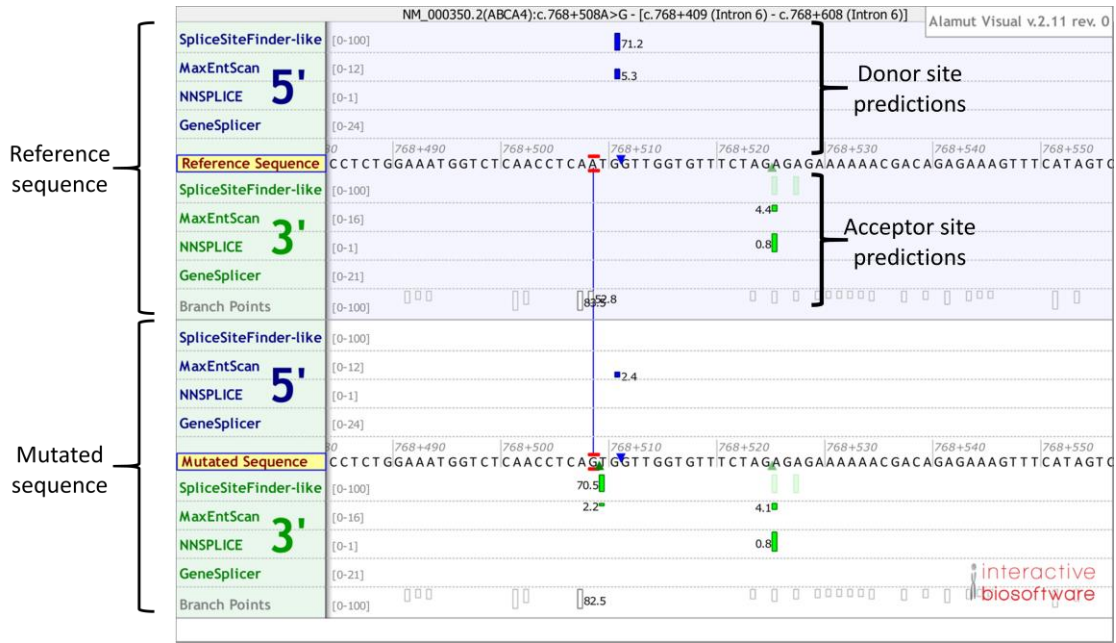

**Figure S1.** *In silico* predictions for variant c.768+508A>G performed on Alamut Visual v.2.11. While NNSPLICE and GeneSplicer report no changes between the reference and the mutated sequences, SSFinder and MaxEntScan predict the activation of an acceptor site and a deactivation of a donor site at the level of the variant.

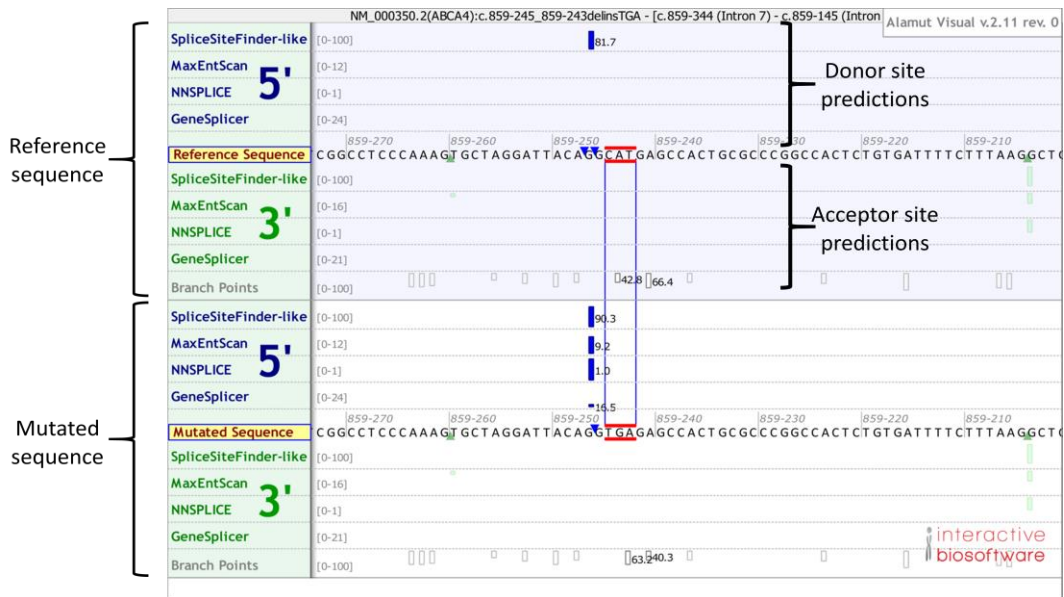

**Figure S2.** *In silico* predictions for variant c.859-245\_859-243delinsTGA performed on Alamut Visual v.2.11. All algorithms used predicted a strong activation of a donor site in correspondence of the variant.

### c.4253+43G>A

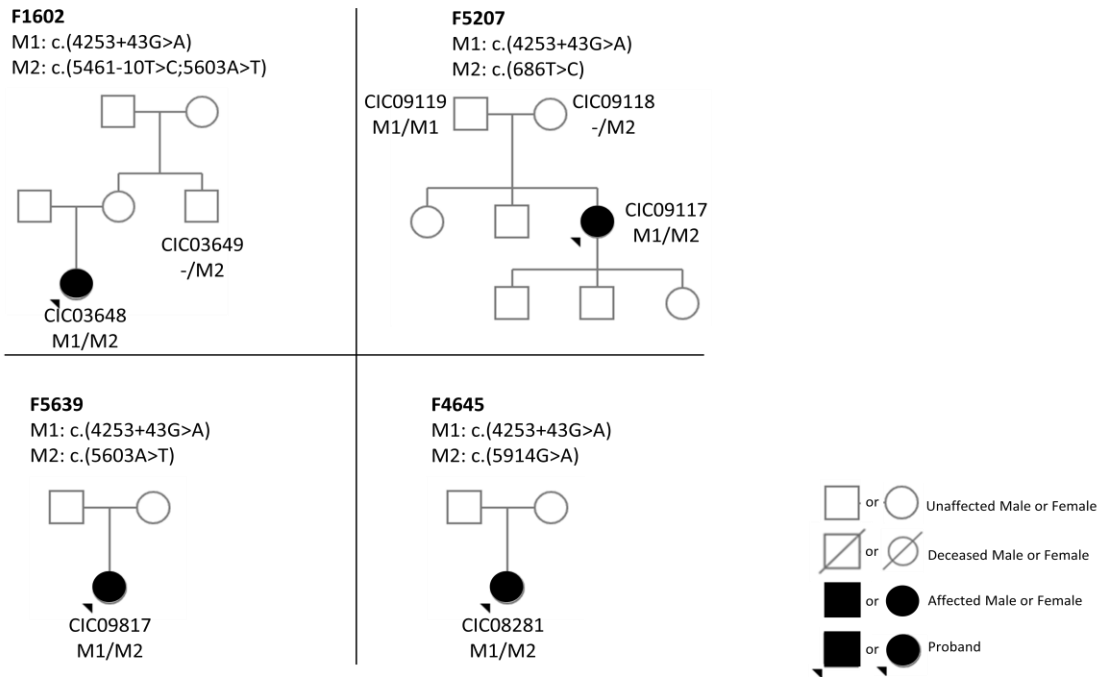

**Figure S3.** Pedigrees of the four families where the mutation c.4253+43G>A is carried by the respective probands.

### c.4539+2064C>T

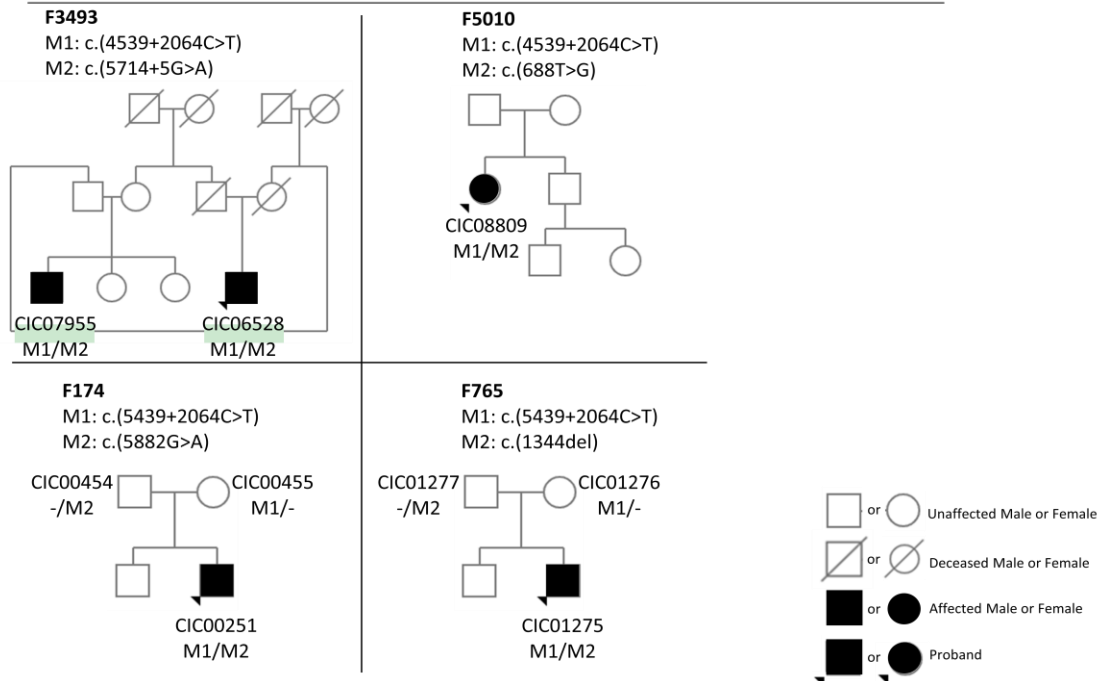

**Figure S4.** Pedigrees of the four families where the mutation c.4539+2064C>T is carried by the respective probands.

## c.5196+1137G>A

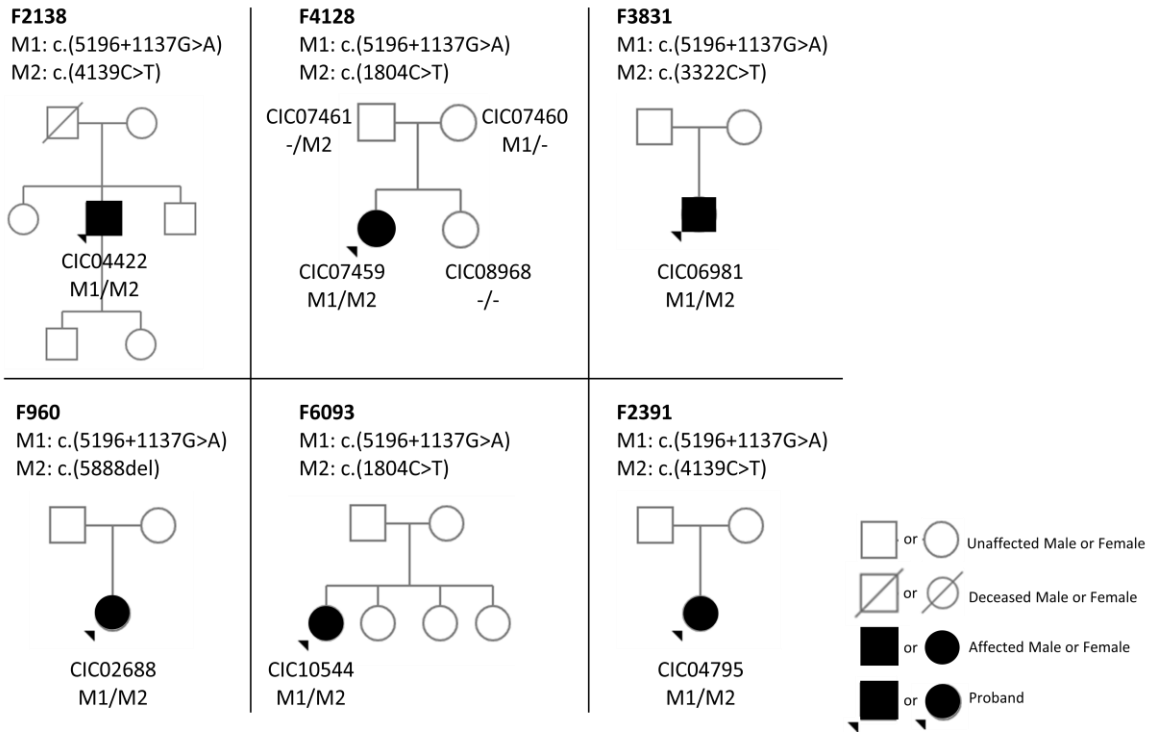

**Figure S5.** Pedigrees of the six families where the mutation c.5196+1137G>A is carried by the respective probands.

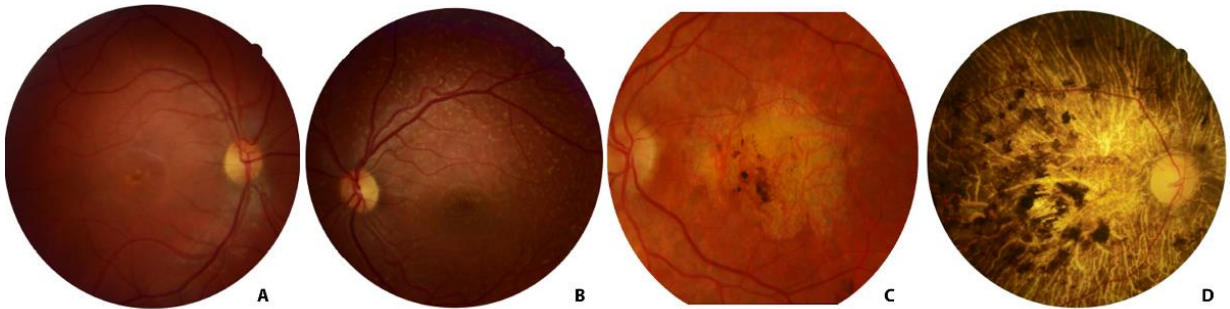

**Figure S6.** Clinical stages of Stargardt disease in color fundus photographs: stage 1 (A); stage 2 (B); stage 3 (C); stage 4 (D).

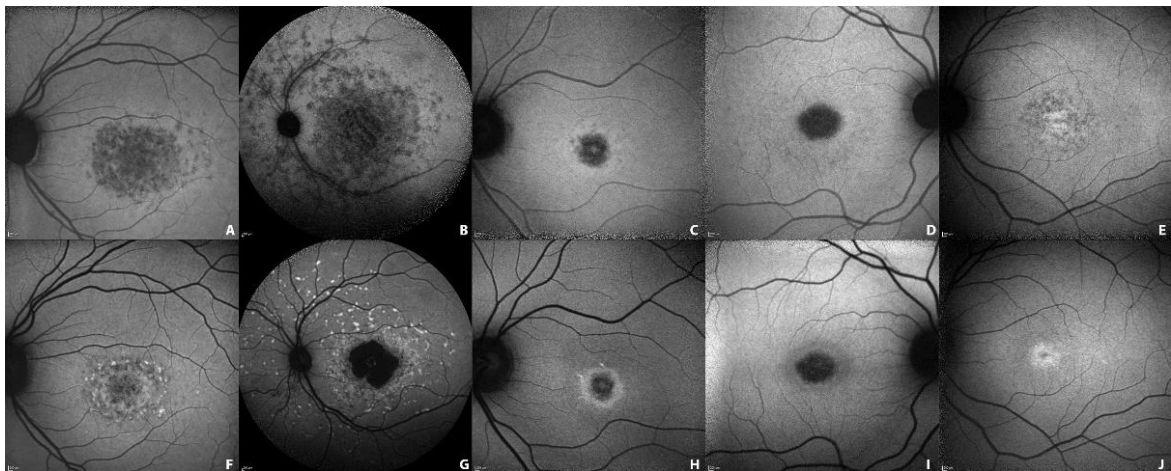

**Figure S7.** Classification of patients using near-infrared (A-E) and short-wavelength (F-J) fundus autofluorescence techniques. Group 1 (A and F); group 2 (B and G); group 3 (C and H); group 4 (D and I); group 5 (E and J).

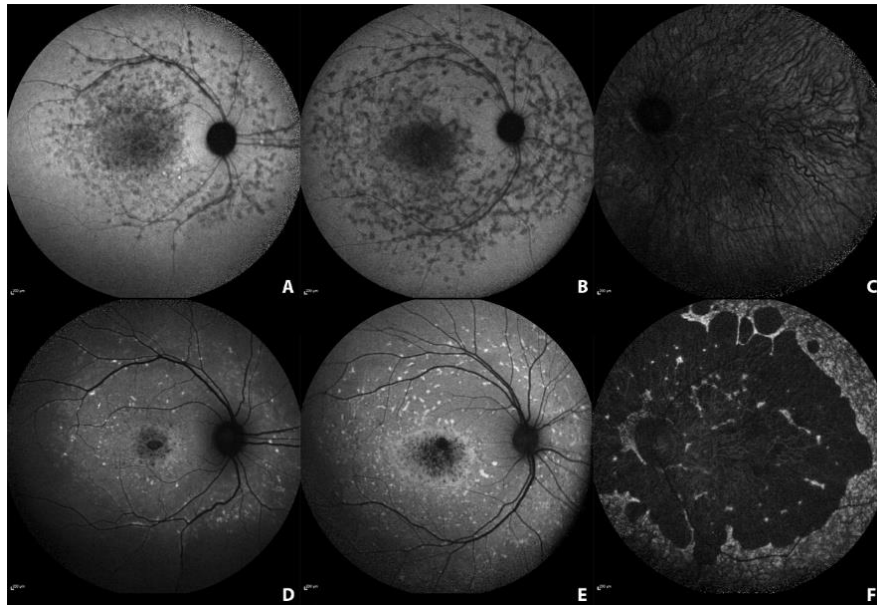

**Figure S8.** Peripapillary sparing assessed by near-infrared (A-C) and short-wavelength (D-F) fundus autofluorescence. Peripapillary area spared (A and D); flecks in the peripapillary area (B and E); atrophy in the peripapillary area (C and F).

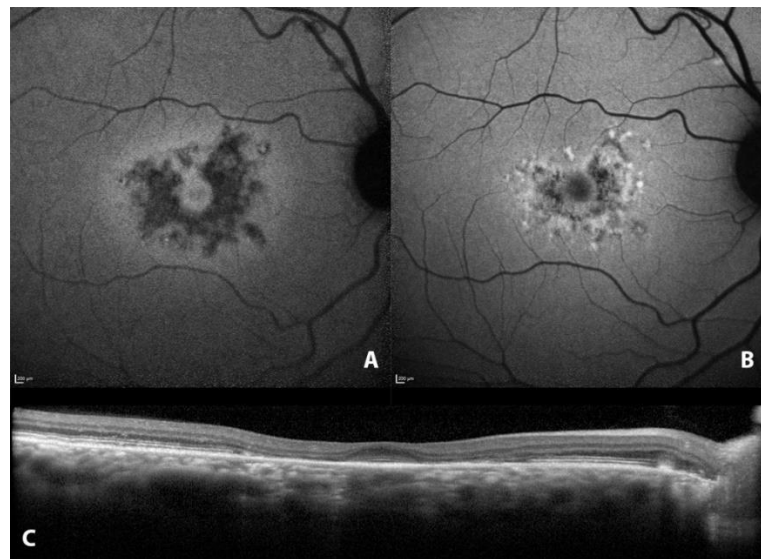

**Figure S9.** Foveal sparing as assessed by near-infrared (A) and short-wavelength (B) fundus autofluorescence and spectral-domain optical coherence tomography (C).

## References

1. Bauwens, M.; Garanto, A.; Sangermano, R.; Naessens, S.; Weisschuh, N.; Zaeytijd, J.D.; Khan, M.; Sadler, F.; Balikova, I.; Cauwenbergh, C.V.; et al. ABCA4 -associated disease as a model for missing heritability in autosomal recessive disorders: novel noncoding splice, cis -regulatory, structural, and recurrent hypomorphic variants. *Genetics in Medicine* **2019**, *1*.



2. Zernant, J.; Xie, Y.A.; Ayuso, C.; Riveiro-Alvarez, R.; Lopez-Martinez, M.-A.; Simonelli, F.; Testa, F.; Gorin, M.B.; Strom, S.P.; Bertelsen, M.; et al. Analysis of the ABCA4 genomic locus in Stargardt disease. *Hum. Mol. Genet.* **2014**, *23*, 6797–6806.
3. Sangermano, R.; Garanto, A.; Khan, M.; Runhart, E.H.; Bauwens, M.; Bax, N.M.; van den Born, L.I.; Khan, M.I.; Cornelis, S.S.; Verheij, J.B.G.M.; et al. Deep-intronic ABCA4 variants explain missing heritability in Stargardt disease and allow correction of splice defects by antisense oligonucleotides. *Genet. Med.* **2019**.
4. Albert, S.; Garanto, A.; Sangermano, R.; Khan, M.; Bax, N.M.; Hoyng, C.B.; Zernant, J.; Lee, W.; Allikmets, R.; Collin, R.W.J.; et al. Identification and Rescue of Splice Defects Caused by Two Neighboring Deep-Intronic ABCA4 Mutations Underlying Stargardt Disease. *Am. J. Hum. Genet.* **2018**, *102*, 517–527.
5. Schulz, H.L.; Grassmann, F.; Kellner, U.; Spital, G.; Rütger, K.; Jägle, H.; Hufendiek, K.; Rating, P.; Huchzermeyer, C.; Baier, M.J.; et al. Mutation Spectrum of the ABCA4 Gene in 335 Stargardt Disease Patients From a Multicenter German Cohort-Impact of Selected Deep Intronic Variants and Common SNPs. *Invest. Ophthalmol. Vis. Sci.* **2017**, *58*, 394–403.
6. Braun, T.A.; Mullins, R.F.; Wagner, A.H.; Andorf, J.L.; Johnston, R.M.; Bakall, B.B.; Deluca, A.P.; Fishman, G.A.; Lam, B.L.; Weleber, R.G.; et al. Non-exomic and synonymous variants in ABCA4 are an important cause of Stargardt disease. *Hum. Mol. Genet.* **2013**, *22*, 5136–5145.
7. Bauwens, M.; De Zaeytijd, J.; Weisschuh, N.; Kohl, S.; Meire, F.; Dahan, K.; Depasse, F.; De Jaegere, S.; De Ravel, T.; De Rademaeker, M.; et al. An augmented ABCA4 screen targeting noncoding regions reveals a deep intronic founder variant in Belgian Stargardt patients. *Hum. Mutat.* **2015**, *36*, 39–42.
8. Lois, N.; Holder, G.E.; Bunce, C.; Fitzke, F.W.; Bird, A.C. Phenotypic subtypes of Stargardt macular dystrophy-fundus flavimaculatus. *Arch. Ophthalmol.* **2001**, *119*, 359–369.
9. Fishman, G.A. Fundus flavimaculatus. A clinical classification. *Arch. Ophthalmol.* **1976**, *94*, 2061–2067.
10. Duncker, T.; Marsiglia, M.; Lee, W.; Zernant, J.; Tsang, S.H.; Allikmets, R.; Greenstein, V.C.; Sparrow, J.R. Correlations among near-infrared and short-wavelength autofluorescence and spectral-domain optical coherence tomography in recessive Stargardt disease. *Invest. Ophthalmol. Vis. Sci.* **2014**, *55*, 8134–8143.
11. Cideciyan, A.V.; Swider, M.; Aleman, T.S.; Sumaroka, A.; Schwartz, S.B.; Roman, M.I.; Milam, A.H.; Bennett, J.; Stone, E.M.; Jacobson, S.G. ABCA4-associated retinal degenerations spare structure and function of the human parapapillary retina. *Invest. Ophthalmol. Vis. Sci.* **2005**, *46*, 4739–4746.
12. Fujinami, K.; Sergouniotis, P.I.; Davidson, A.E.; Wright, G.; Chana, R.K.; Tsunoda, K.; Tsubota, K.; Egan, C.A.; Robson, A.G.; Moore, A.T.; et al. Clinical and molecular analysis of Stargardt disease with preserved foveal structure and function. *Am. J. Ophthalmol.* **2013**, *156*, 487-501.e1.
